# Supplementary material for: Predictive machine learning and multimodal data to develop highly sensitive, composite biomarkers of disease progression in Friedreich Ataxia
Source: Research Square preprint supplement (doi:10.21203/rs.3.rs-5272175/v1), 2025-04-04
Supplement: Supplementary file 1 [file 83d6516cb4bb9a36f48031e8.docx]

**Supplementary Data**

**
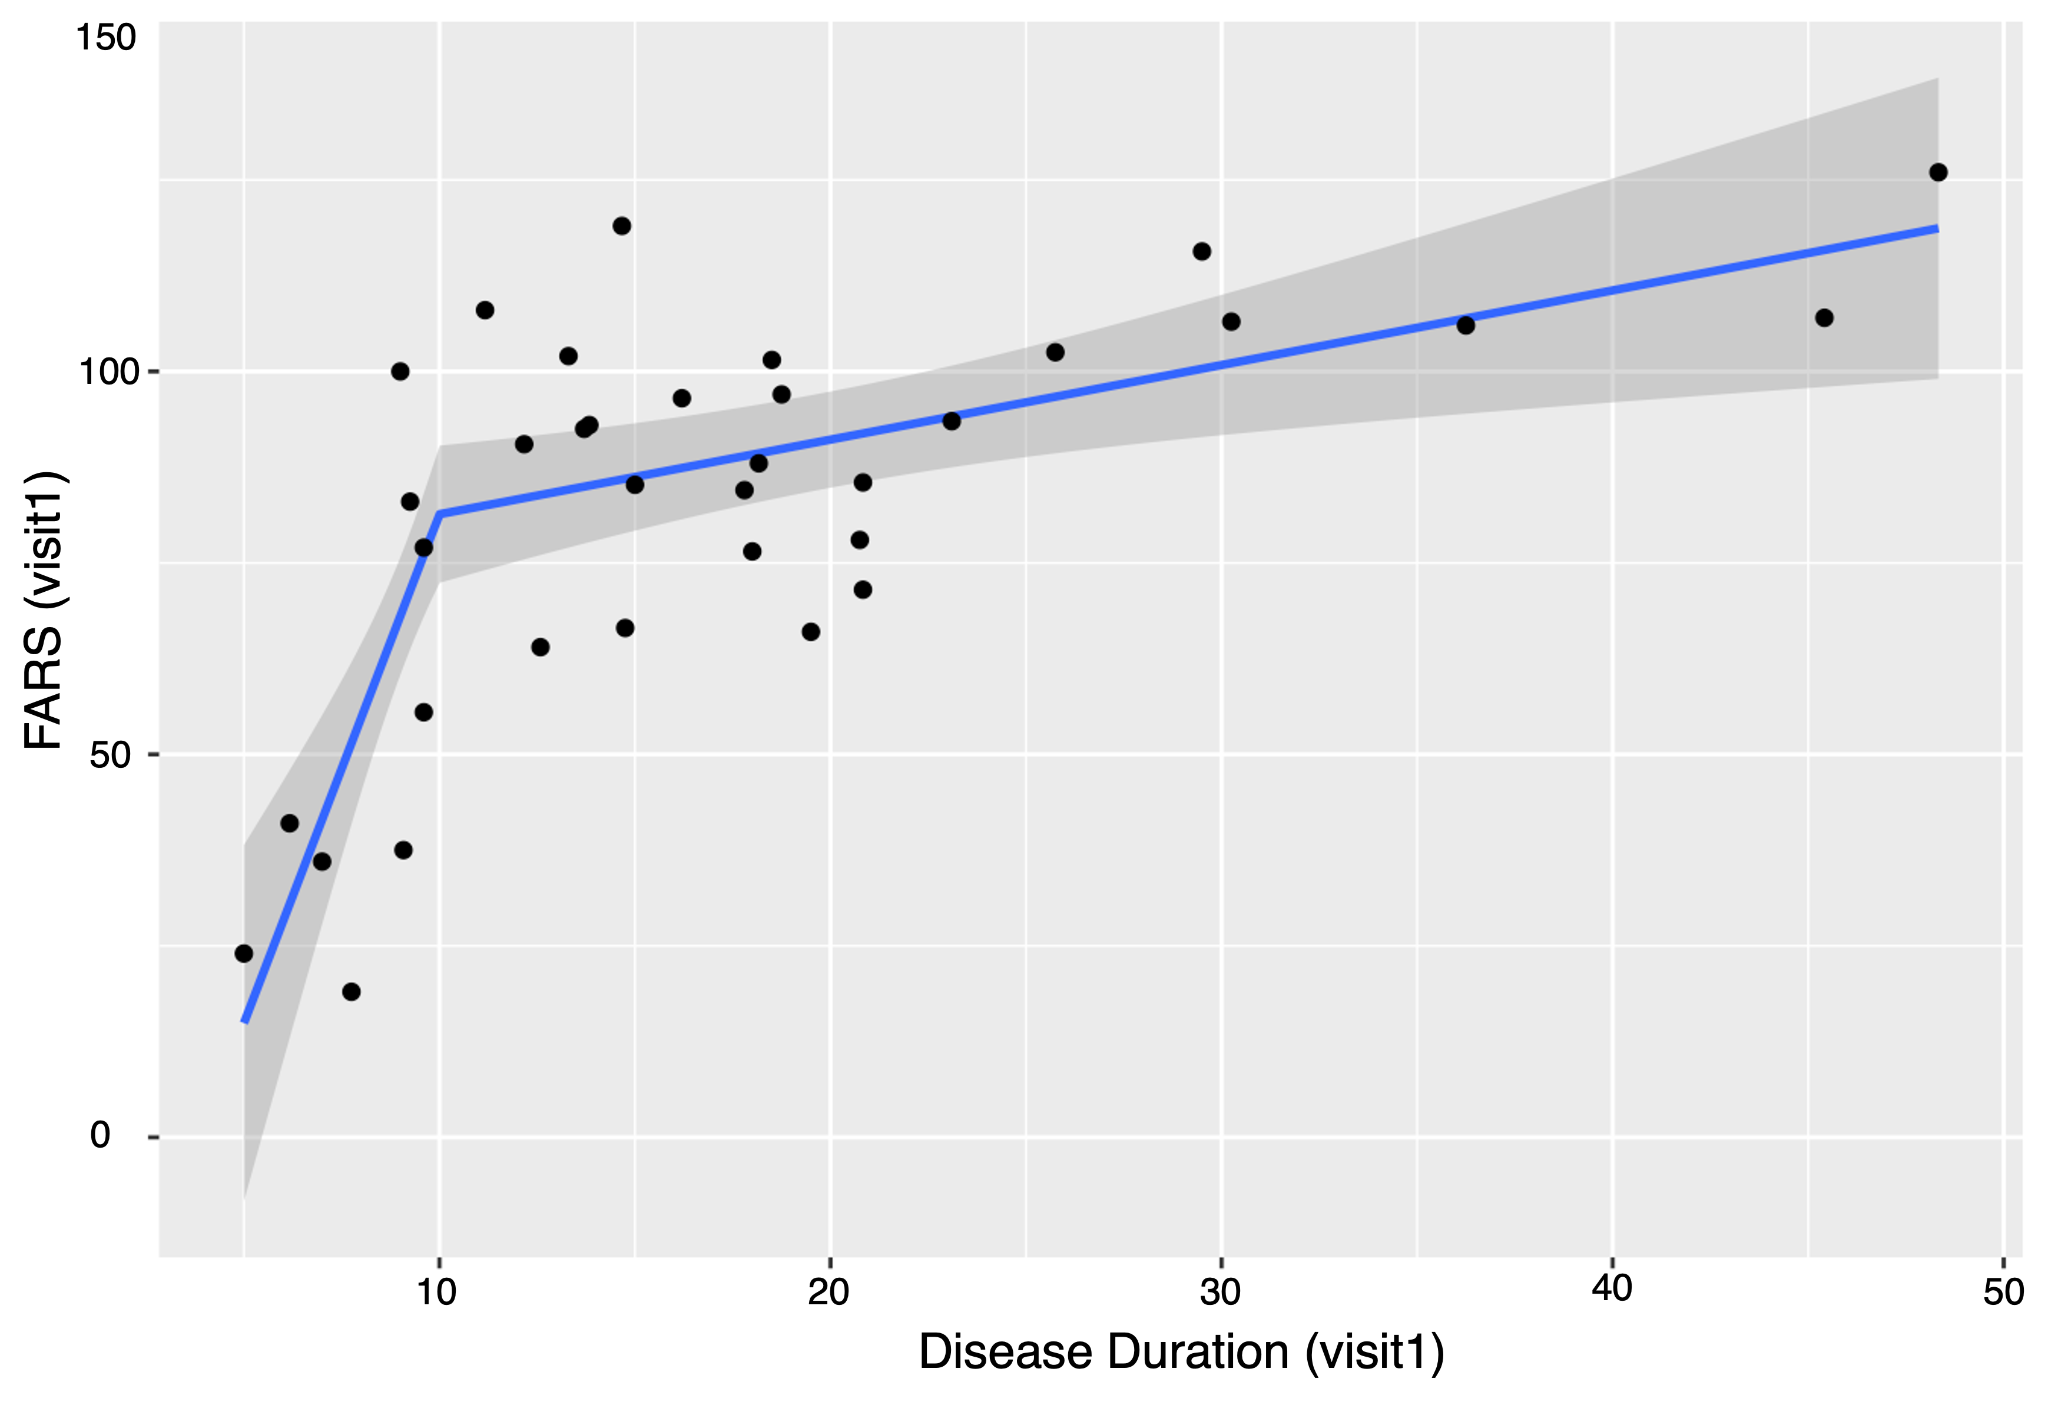
**

**Figure S1:** Plot of FARS scores against disease duration, at visit1


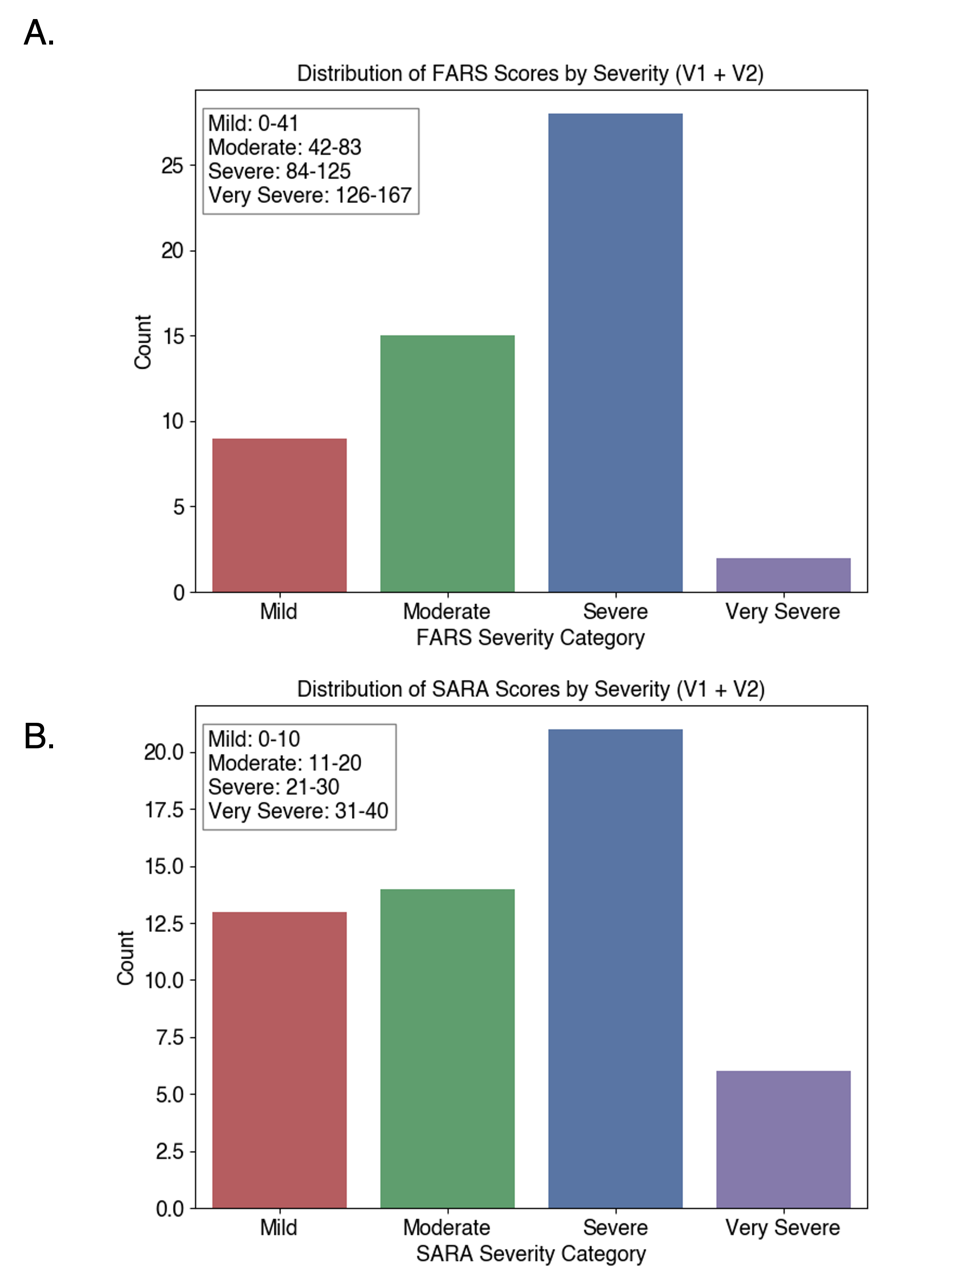


**Figure S2:** Distribution of FARS and SARA scores (according to disease severity level). The severity categorisation for FARS and SARA scores is based on quartile approximations of their total score ranges.

**Table S1:** Statistical measures related to disease progression sensitivity for additional composites (highest to lowest d-scores), surrogates or complementary to FARS

| Biomarker | group | n | r2 | mean_  change | sd_  change | d |
| --- | --- | --- | --- | --- | --- | --- |
| QSM | FRDA | 20 | 0.72 | 7.3 | 5.3 | 1.39* |
| Control | 18 | 0.84 | 3.8 | 2.7 | 1.43* |
| background+structural | FRDA | 25 | 0.89 | 6.8 | 8.8 | 0.78* |
| background+QSM | FRDA | 20 | 0.95 | 6.6 | 8.5 | 0.77* |
| background | FRDA | 31 | 0.95 | 6.4 | 8.2 | 0.77* |
| all_neuroimaging | FRDA | 15 | 0.89 | 5.2 | 7.4 | 0.7* |
| Control | 14 | 0.32 | -2.5 | 13.0 | -0.19 |
| background+structural+diffusion | FRDA | 23 | 0.93 | 5 | 7.7 | 0.64* |
| structural | FRDA | 25 | 0.85 | 6.7 | 10.6 | 0.63* |
| Control | 27 | 0.87 | 2.0 | 7.0 | 0.29 |
| background+diffusion | FRDA | 26 | 0.94 | 3.9 | 7.2 | 0.54* |
| diffusion | FRDA | 26 | 0.89 | -0.6 | 6.8 | -0.09 (p=0.05) |
| Control | 28 | 0.15 | -4.1 | 10.5 | -0.39 |

n = no of participants; sd = standard deviation; *= p<0.05

**Table S2:** Statistical measures related to disease progression sensitivity for single imaging biomarkers

| Biomarker | group | n | r2 | mean_  change | sd_  change | d |
| --- | --- | --- | --- | --- | --- | --- |
| scp_vol | Control | 27 | 0.87 | -11.5 | 27.2 | -0.42* |
| FRDA | 25 | 0.85 | -23.1 | 32.0 | -0.72* |
| mcp_vol | Control | 27 | 0.96 | -1 | 213 | -0.01 |
| FRDA | 25 | 0.93 | -66 | 307 | -0.21 |
| icp_vol | Control | 27 | 0.91 | -36 | 103 | -0.35 |
| FRDA | 25 | 0.88 | -85 | 124 | -0.69* |
| midbrain_vol | Control | 27 | 0.73 | -97 | 358 | -0.27 |
| FRDA | 25 | 0.79 | -232 | 354 | -0.65* |
| pons_vol | Control | 27 | 0.96 | -78 | 378 | -0.21 |
| FRDA | 25 | 0.95 | -210 | 434 | -0.48* |
| medualla_vol | Control | 27 | 0.84 | -88 | 195 | -0.45* |
| FRDA | 25 | 0.71 | -162 | 292 | -0.56* |
| ant_CBLM_I_V_vol | Control | 27 | 0.95 | -106 | 348 | -0.3 |
| FRDA | 25 | 0.97 | -46 | 278 | -0.16 |
| sup-post_CBLM_VI_VII_vol | Control | 27 | 0.86 | -813 | 2076 | -0.39 |
| FRDA | 25 | 0.88 | -1900 | 2713 | -0.7* |
| inf-post_CBLM_VIII_IX_vol | Control | 27 | 0.89 | -115 | 704 | -0.16 |
| FRDA | 25 | 0.88 | 115 | 979 | 0.12 |
| floc_CBLM_X_vol | Control | 27 | 0.82 | -9.5 | 36.6 | -0.26 |
| FRDA | 25 | 0.82 | -4.4 | 41.1 | -0.11 |
| vermis_CBLM_vol | Control | 27 | 0.82 | -32 | 154 | -0.21 |
| FRDA | 25 | 0.87 | 7 | 187 | 0.04 |
| dentate_L_vol | Control | 18 | 0.83 | -139 | 123 | -1.13* |
| FRDA | 20 | 0.83 | -102 | 93 | -1.1* |
| dentate_R_vol | Control | 18 | 0.9 | -103 | 107 | -0.97* |
| FRDA | 20 | 0.47 | -125 | 154 | -0.81* |
| dentate_L_susceptibility | Control | 18 | 0.9 | 0.0064 | 0.0084 | 0.76* |
| FRDA | 20 | 0.54 | 0.0167 | 0.0185 | 0.9* |
| dentate_R_susceptibility | Control | 18 | 0.88 | 0.0001 | 0.01 | 0.01 |
| FRDA | 20 | 0.71 | 0.01 | 0.02 | 0.8* |
| scp_fa | Control | 28 | 0.36 | 0.003 | 0.0117 | 0.25 |
| FRDA | 26 | 0.82 | -0.004 | 0.0086 | -0.46* |
| mcp_fa | Control | 28 | 0.33 | 0.0043 | 0.0198 | 0.22 |
| FRDA | 26 | 0.62 | -0.0024 | 0.0154 | -0.16 |
| icp_fa | Control | 28 | 0.19 | 0.0047 | 0.0209 | 0.22 |
| FRDA | 26 | 0.72 | 0.0014 | 0.0163 | 0.08 |
| scp_md | Control | 28 | 0.4 | -0.0044 | 0.0204 | -0.21 |
| FRDA | 26 | 0.83 | -0.0031 | 0.0124 | -0.25 |
| md_mcp | Control | 28 | 0.1 | -0.0088 | 0.0338 | -0.26 |
| FRDA | 26 | 0.8 | -0.0009 | 0.0169 | -0.05 |
| icp_md | Control | 28 | 0 | -0.0094 | 0.038 | -0.24 |
| FRDA | 26 | 0.51 | -0.0026 | 0.039 | -0.07 |
| scp_ad | Control | 28 | 0.33 | -0.0042 | 0.03 | -0.14 |
| FRDA | 26 | 0.73 | -0.01 | 0.02 | -0.40 |
| mcp_ad | Control | 28 | 0.08 | -0.01 | 0.04 | -0.22 |
| FRDA | 26 | 0.81 | -0.0026 | 0.0162 | -0.16 |
| icp_ad | Control | 28 | 0.01 | -0.0087 | 0.0493 | -0.18 |
| FRDA | 26 | 0.36 | -0.0023 | 0.0481 | -0.05 |
| scp_rd | Control | 28 | 0.46 | -0.0045 | 0.0167 | -0.27 |
| FRDA | 26 | 0.89 | -0.0010 | 0.0102 | -0.1 |
| mcp_rd | Control | 28 | 0.12 | -0.0088 | 0.0325 | -0.27 |
| FRDA | 26 | 0.78 | 0.0000 | 0.0184 | 0.001 |
| icp_rd | Control | 28 | 0 | -0.0097 | 0.0342 | -0.28 |
| FRDA | 26 | 0.6 | -0.0028 | 0.0355 | -0.08 |

FRDA = Friedreich Ataxia; sd = standard deviation; n = no of participants; *= p<0.05

Table S3: Predictive performance of composites for SARA (Scale for Assessment and Rating of Ataxia) scores and their sensitivity to FRDA progression; bold represents the recommended surrogate biomarker for SARA

| Composites/Single biomarkers | npred | nsensitivity | | R2 | RMSE | d-score |
| --- | --- | --- | --- | --- | --- | --- |
| **background+all_neuroimaging** | **31** | **15** | **0.72** | | **4.68** | **1.09*** |
| background+structural+diffusion | 31 | 23 | 0.82 | | 3.78 | 0.62* |
| background+QSM | 31 | 31** | 0.5 | | 6.52 | 0.59* |
| background+structural | 31 | 25 | 0.5 | | 6.08 | 0.86* |
| background+diffusion | 31 | 26 | 0.55 | | 5.95 | 0.47* |
| background | 31 | 31 | 0.5 | | 6.28 | 0.71* |
| all_neuroimaging | 31 | 15 | 0.64 | | 5.35 | 1.09* |
| structural | 31 | 25 | 0.35 | | 7.18 | 0.81* |
| diffusion | 31 | 26 | 0.29 | | 7.52 | -0.07* |
| QSM | 31 | 20 | -0.07 | | 9.21 | 1.48* |
| SARA |  | 27 |  | |  | 0.8* |

npred = no of samples (visits) included in the predictive-ML model

nsensitivity = no of participants included in the sensitivity analysis

*= p<0.05

** The background and QSM composite didn’t include any QSM components with non-zero coefficients, making it measurable in 31 participants with FRDA.

Table S4: Composite Score Equation (background+all_neuroimaging), compliments or surrogates to SARA (with the original weights of predictors estimated by the model in their original scale)

| **Background components** | *1.254sex - 0.057ageonset + 0.002GAA1repeatlength - 0.007GAA2repeatlength + 0.026agescan + 1.552DiseaseDurationto_10 + 0.15DiseaseDuration10_up* |
| --- | --- |
|  | **+** |
| **Structural neuroimaging components** | *0.008scpvol + 0.003mcpvol - 0.012icpvol - 0.002midbrainvol + 0.001ponsvol*  *+ 0.004medullavol - 0.003ant_CBLM_I_Vvol + 0.001inf-post_CBLM_VIII_IXvol + 0.024floc_CBLM_Xvol - 0.007vermis_CBLMvol*  **+** |
| **Diffusion**  **neuroimaging components** | *69.736scp_fa - 110.578mcp_fa - 91.69icp_fa - 3.848scp_md - 15.102mcp_md + 18.733icp_md - 0.038scp_ad - 31.902mcp_ad - 10.083mcp_ad - 5.045scp_rd - 4.351mcp_rd + 32.105icp_rd*  **+** |
|
| **QSM**  **neuroimaging components** | *0.004dentate_Lvol - 0.003dentate_Rvol + 11.217dentate_Lsusceptibility + 26.242dentate_Lsusceptibility* |
